# Supplementary material for: Novel piperazine–triazole hybrids as PTP1B and alpha-amylase inhibitors: synthesis, biological evaluation and computational validation through network pharmacology, molecular docking, MD simulations, DFT and MMPBSA analysis
Source: Royal Society of Chemistry journal article supplement (doi:10.1039/d6ra00931j), 2026-04-27
Supplement: d6ra00931j1.pdf [file d6ra00931j1.pdf]

## Novel Piperazine-Triazole Hybrids as PTP1B and Alpha-Amylase Inhibitors: Synthesis, Biological Evaluation and Computational Validation Through Network Pharmacology, Molecular Docking, MD Simulations, DFT and MMPBSA Analysis

### 1. $^1\text{H}$ NMR and $^{13}\text{C}$ NMR of piperazine conjugates **13a-13j**

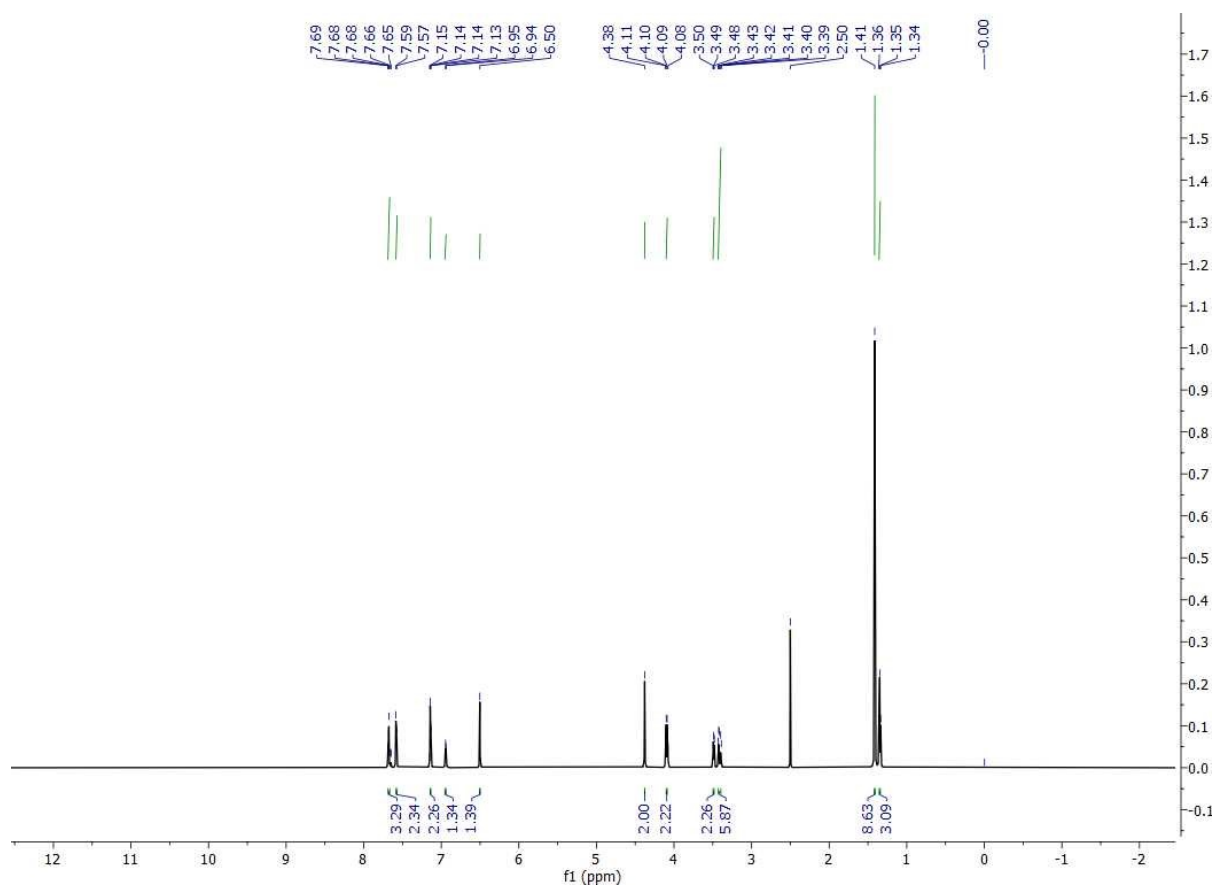

**Figure S1:**  $^1\text{H}$ NMR spectra of **13a**

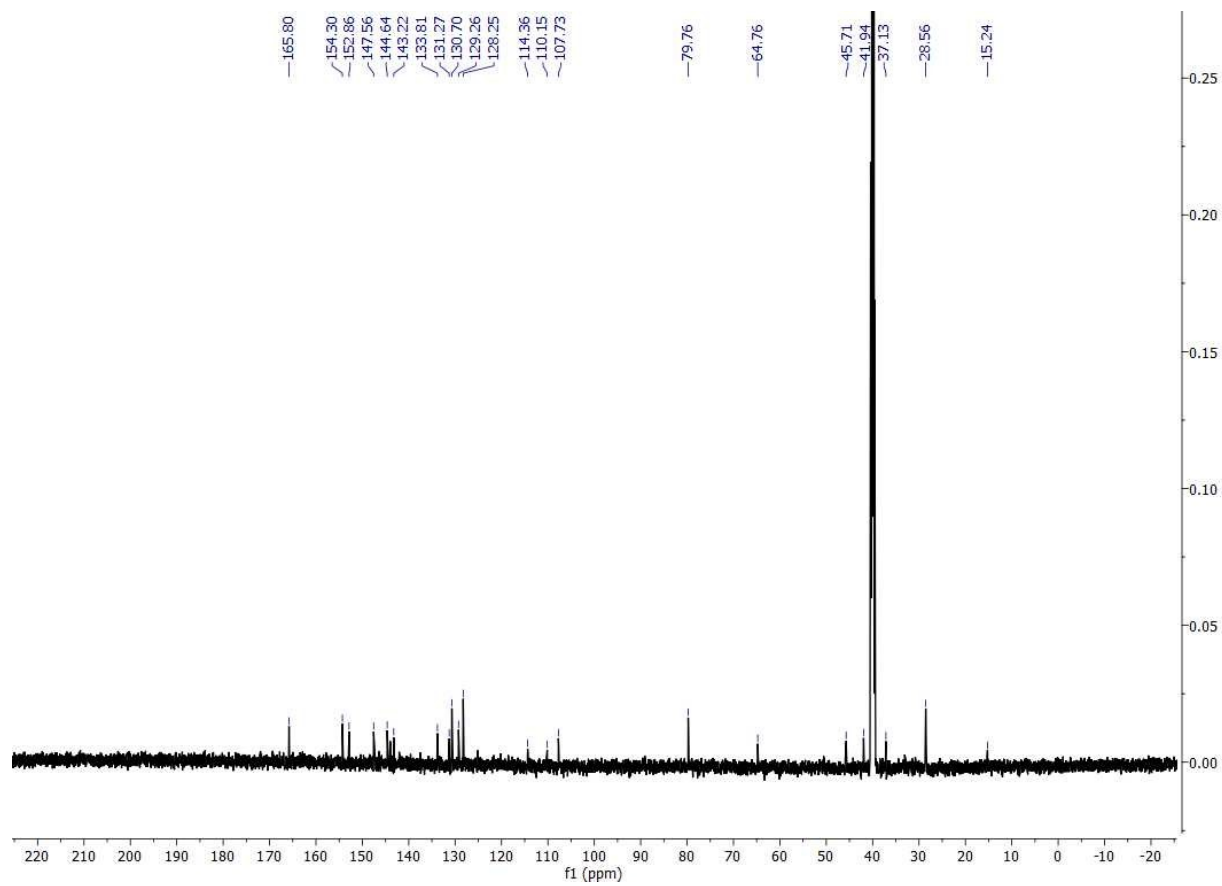

**Figure S2:**  $^{13}\text{C}$  NMR spectra of 13a

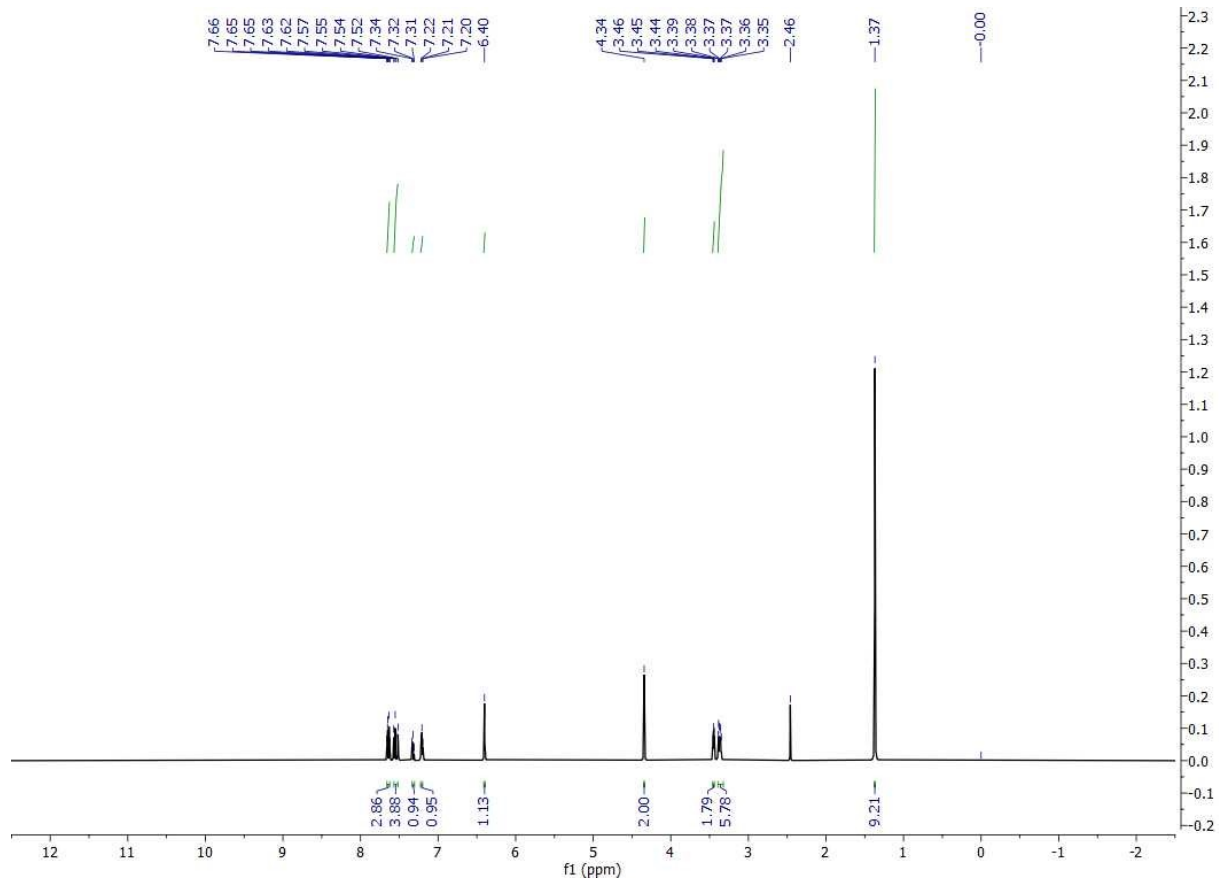

**Figure S3:**  $^1\text{H}$ NMR spectra of 13b

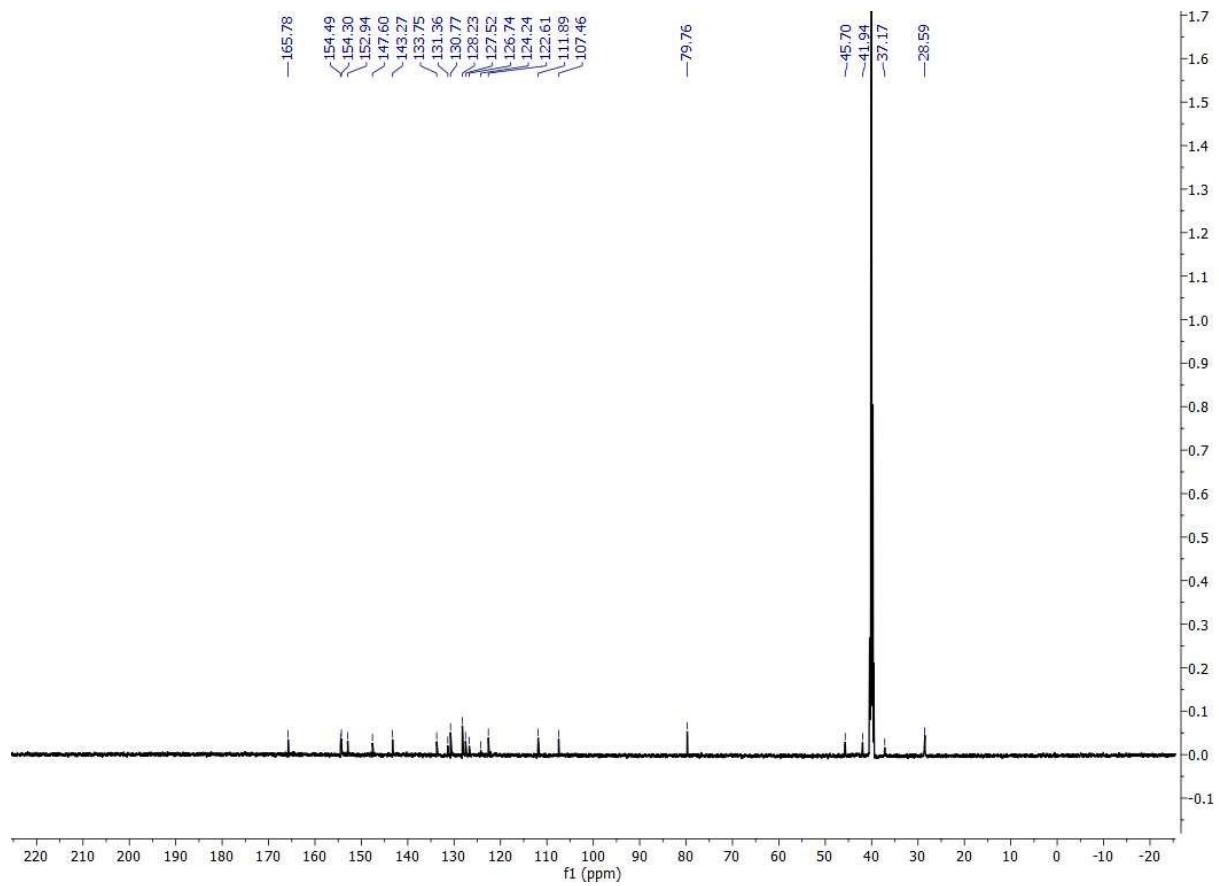

**Figure S4:**  $^{13}\text{C}$  NMR spectra of **13b**

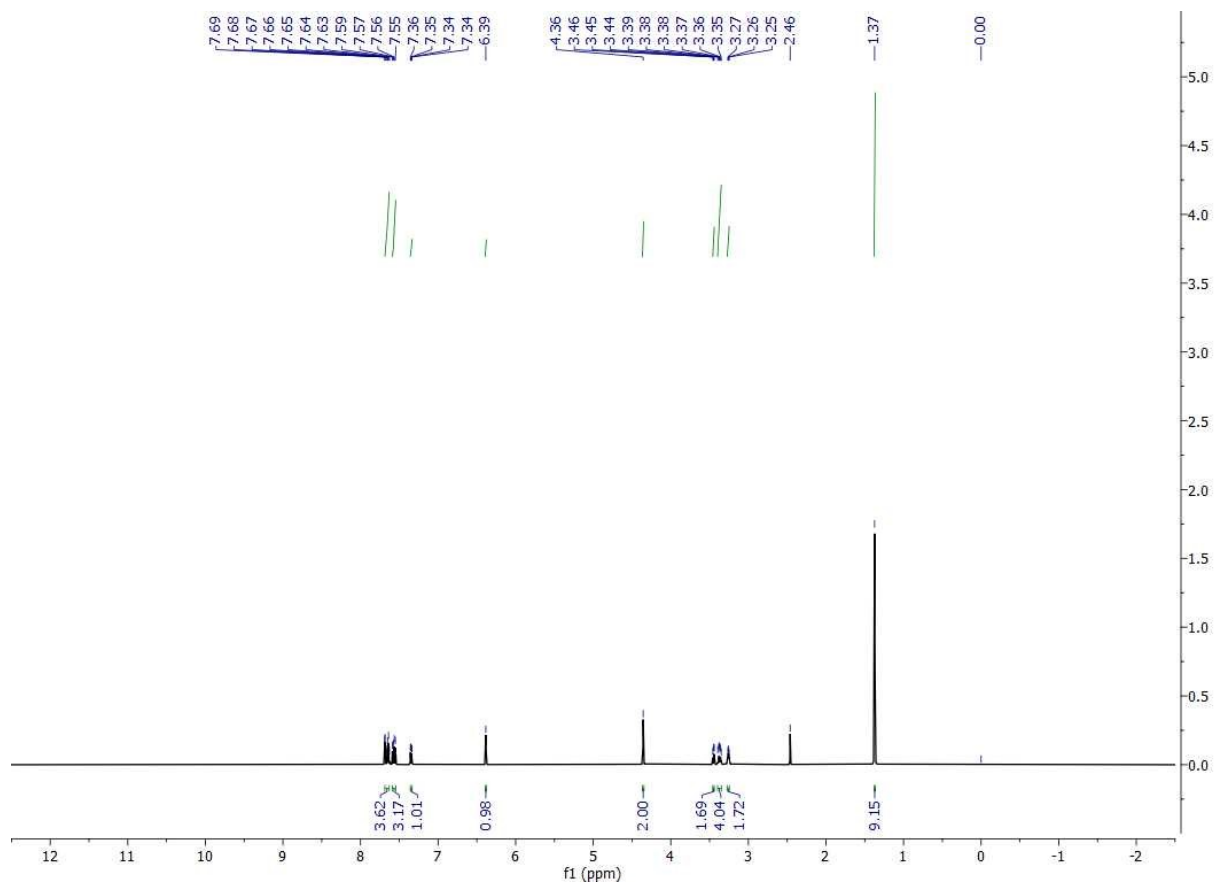

**Figure S5:**  $^1\text{H}$ NMR spectra of **13c**

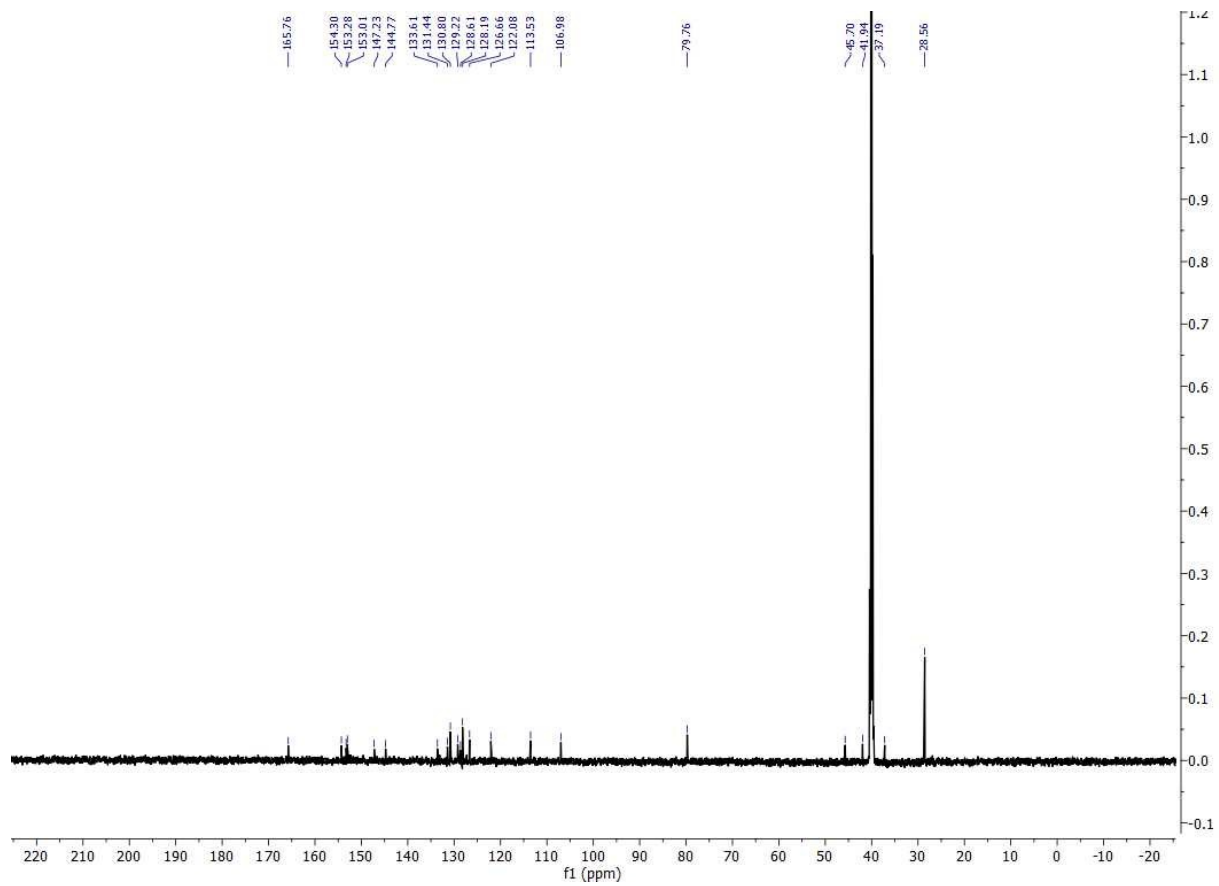

**Figure S6:**  $^{13}\text{C}$  NMR spectra of 13c

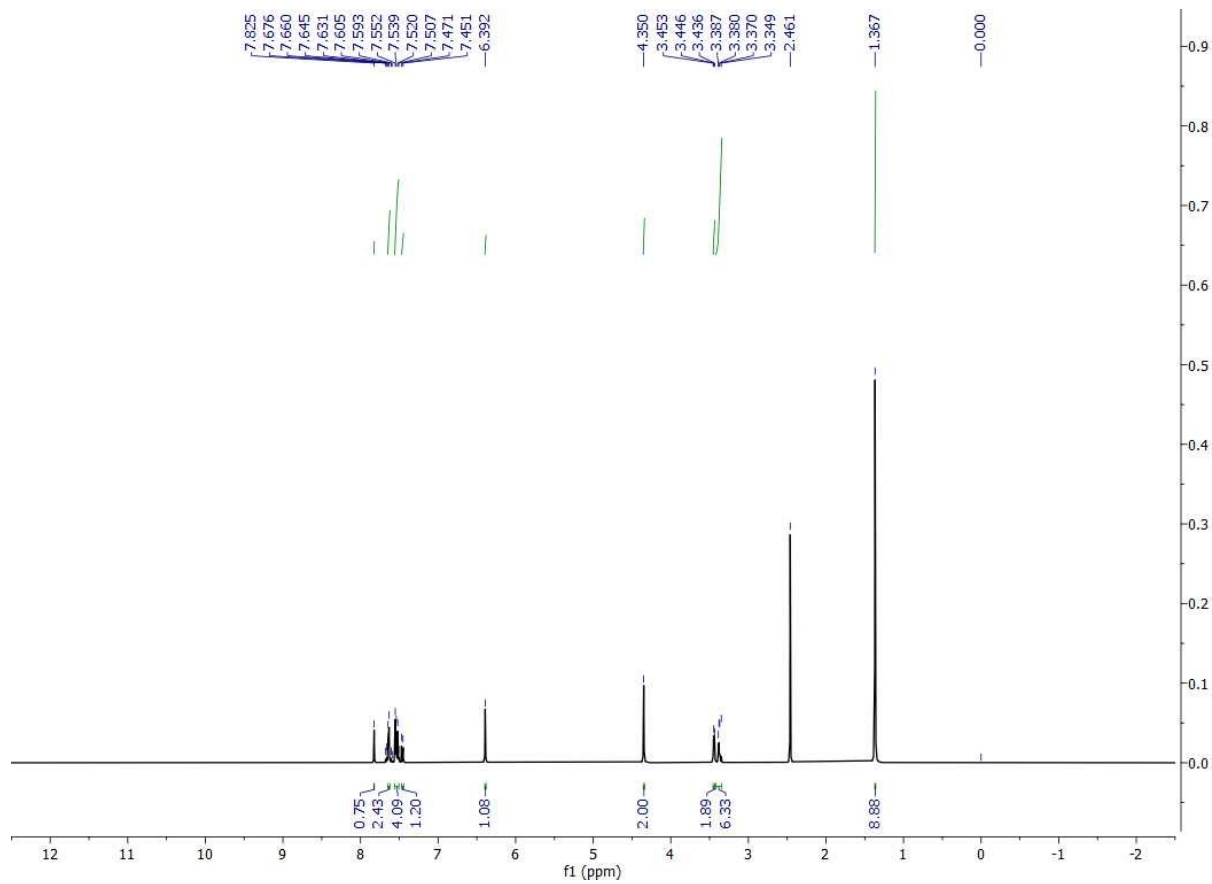

**Figure S7:** <sup>1</sup>H NMR spectra of 13d

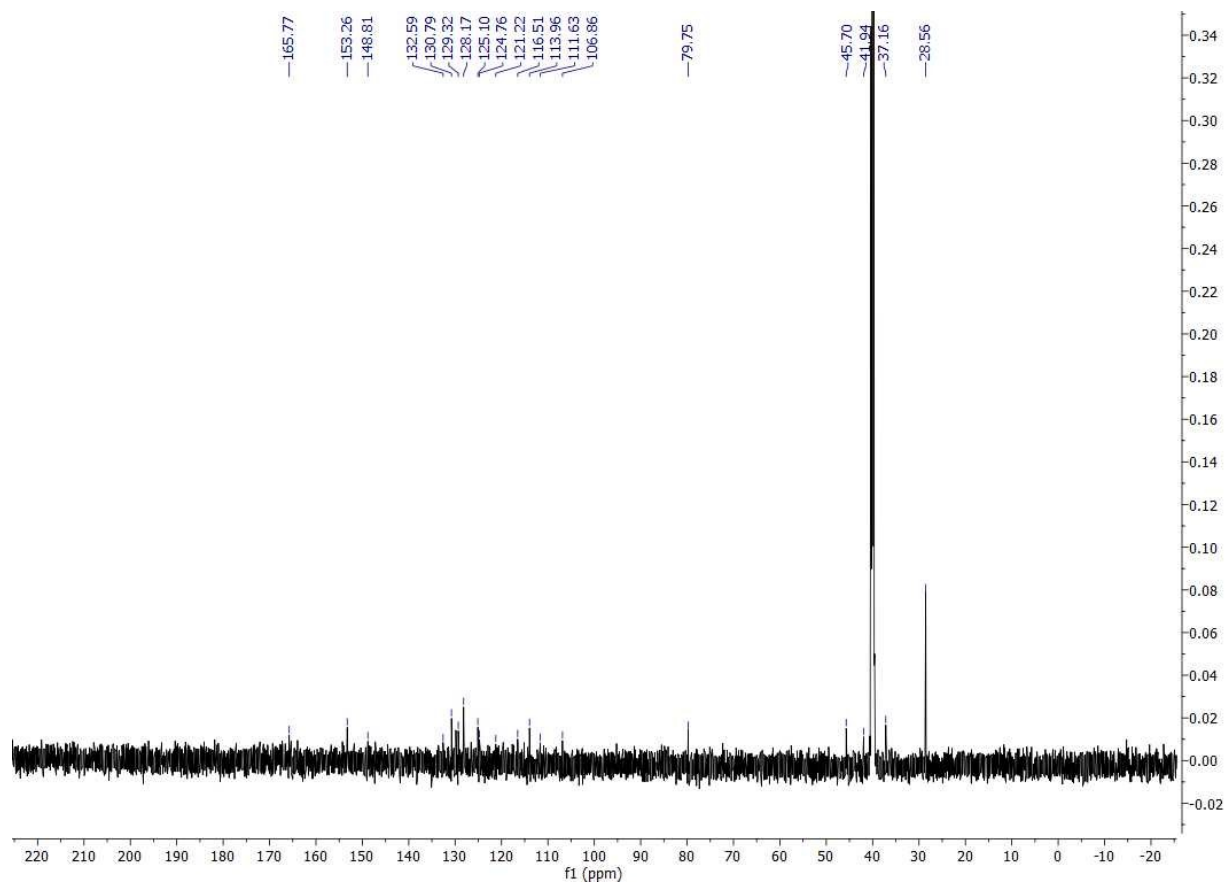

**Figure S8:**  $^{13}\text{C}$  NMR spectra of **13d**

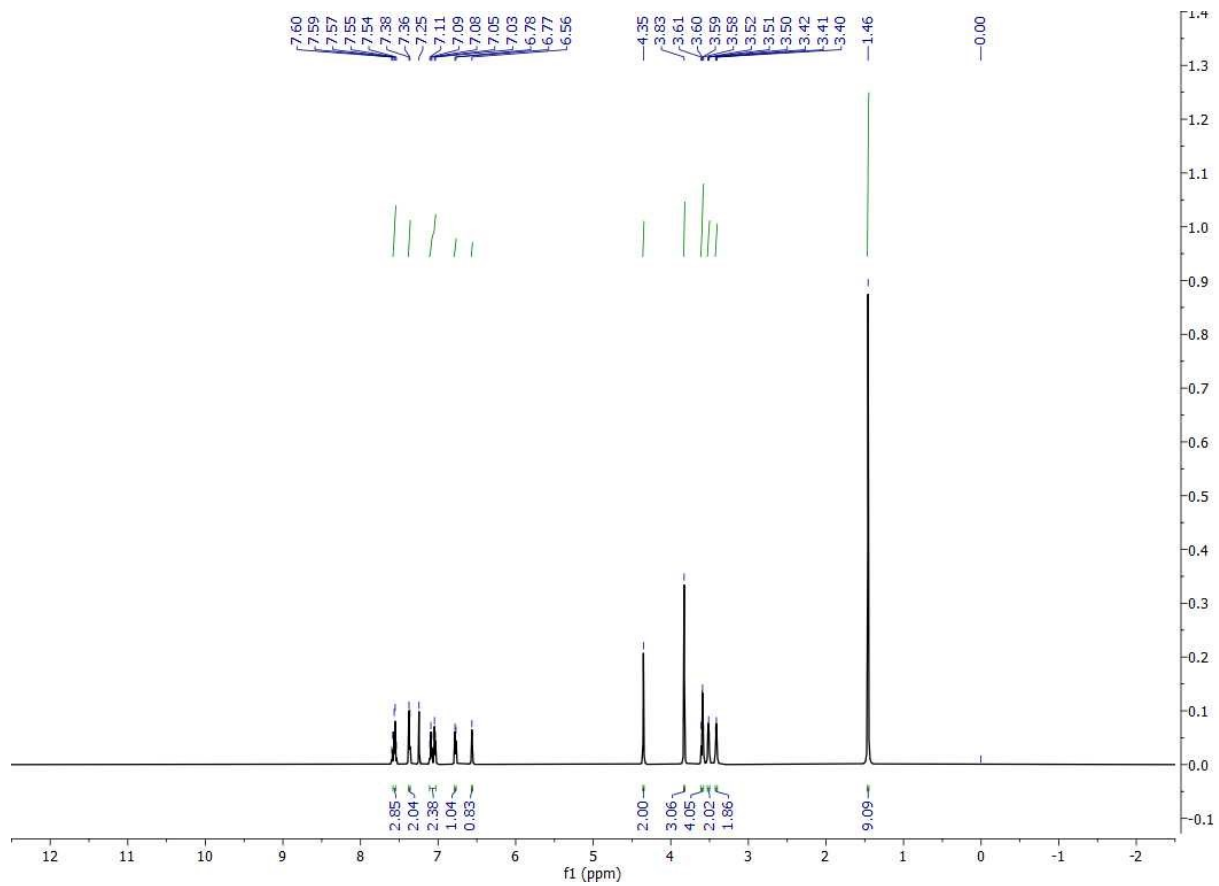

Figure S9: <sup>1</sup>H NMR spectra of 13e

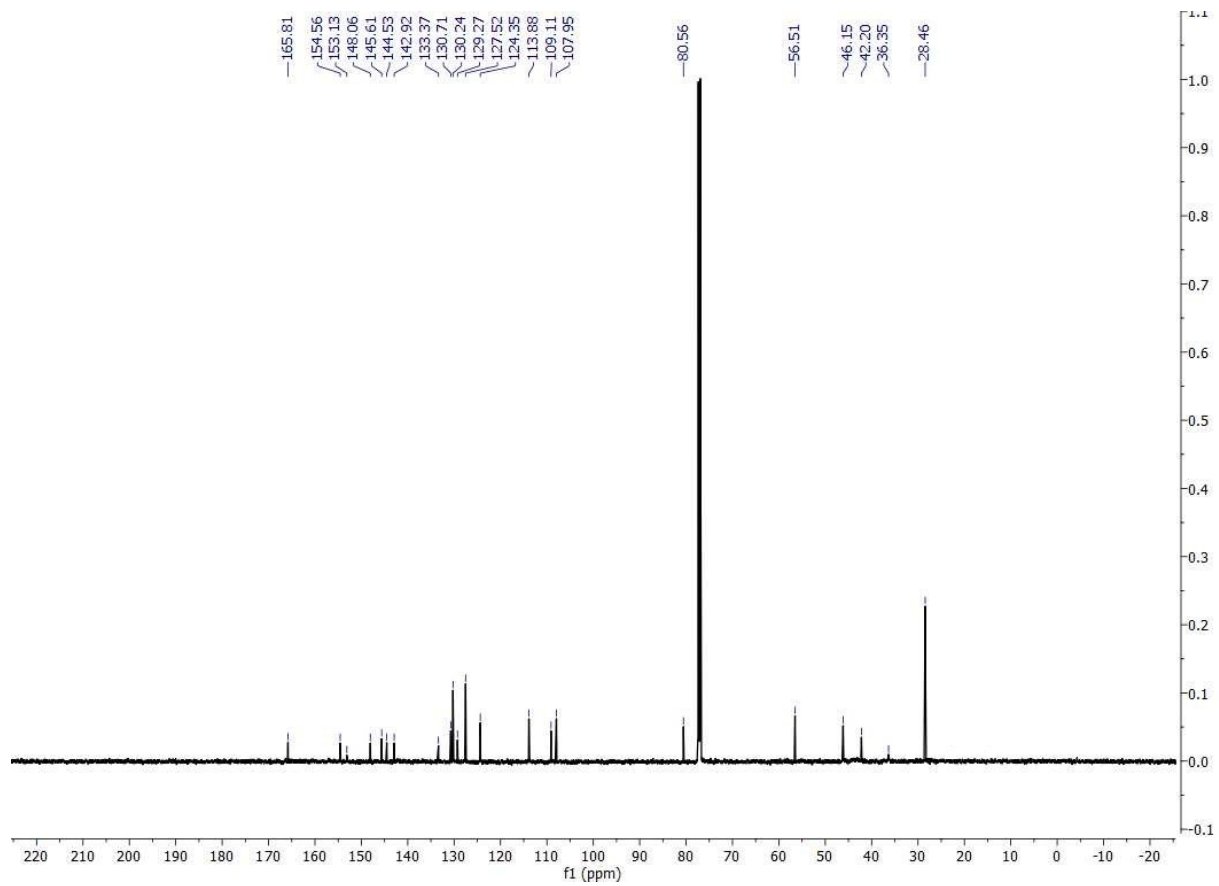

**Figure S10:**  $^{13}\text{C}$  NMR spectra of **13e**

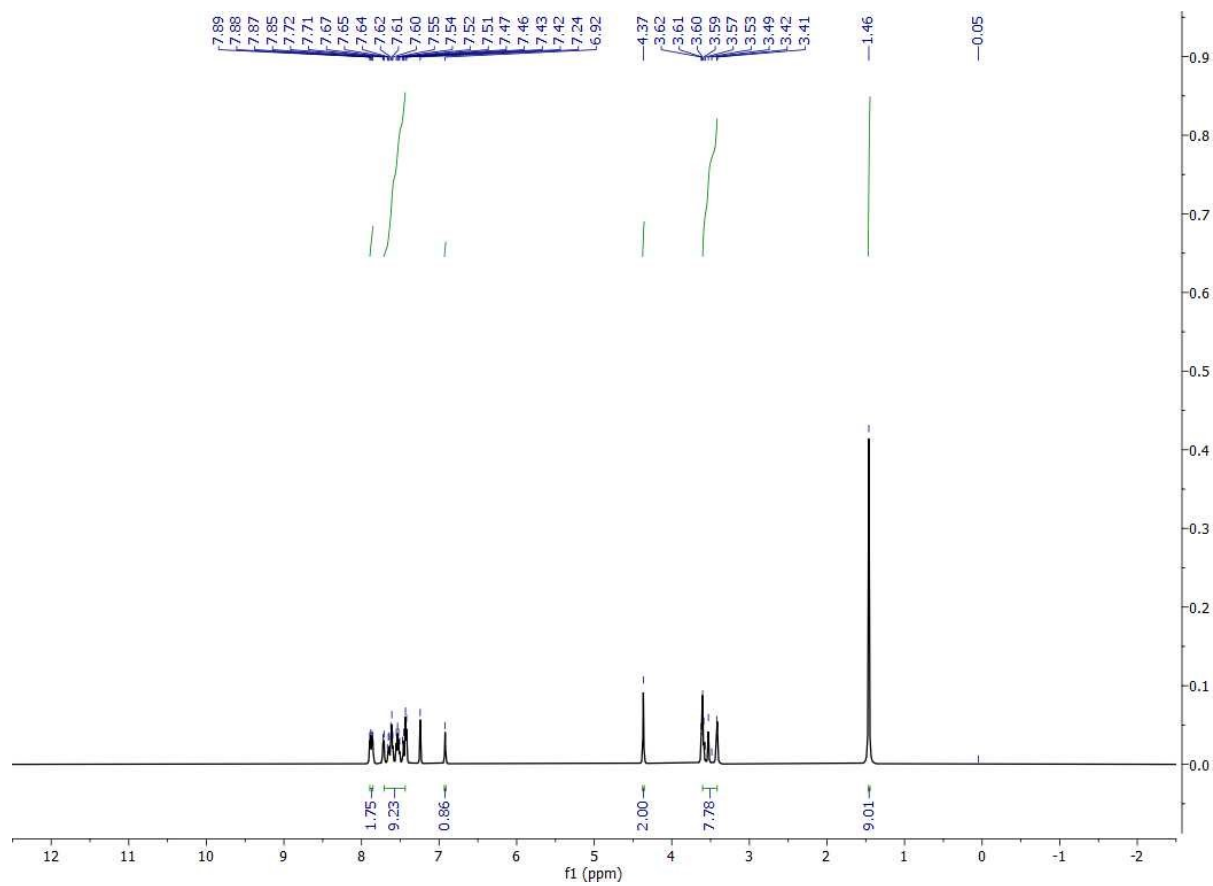

**Figure S11:**  $^1\text{H}$ NMR spectra of **13f**

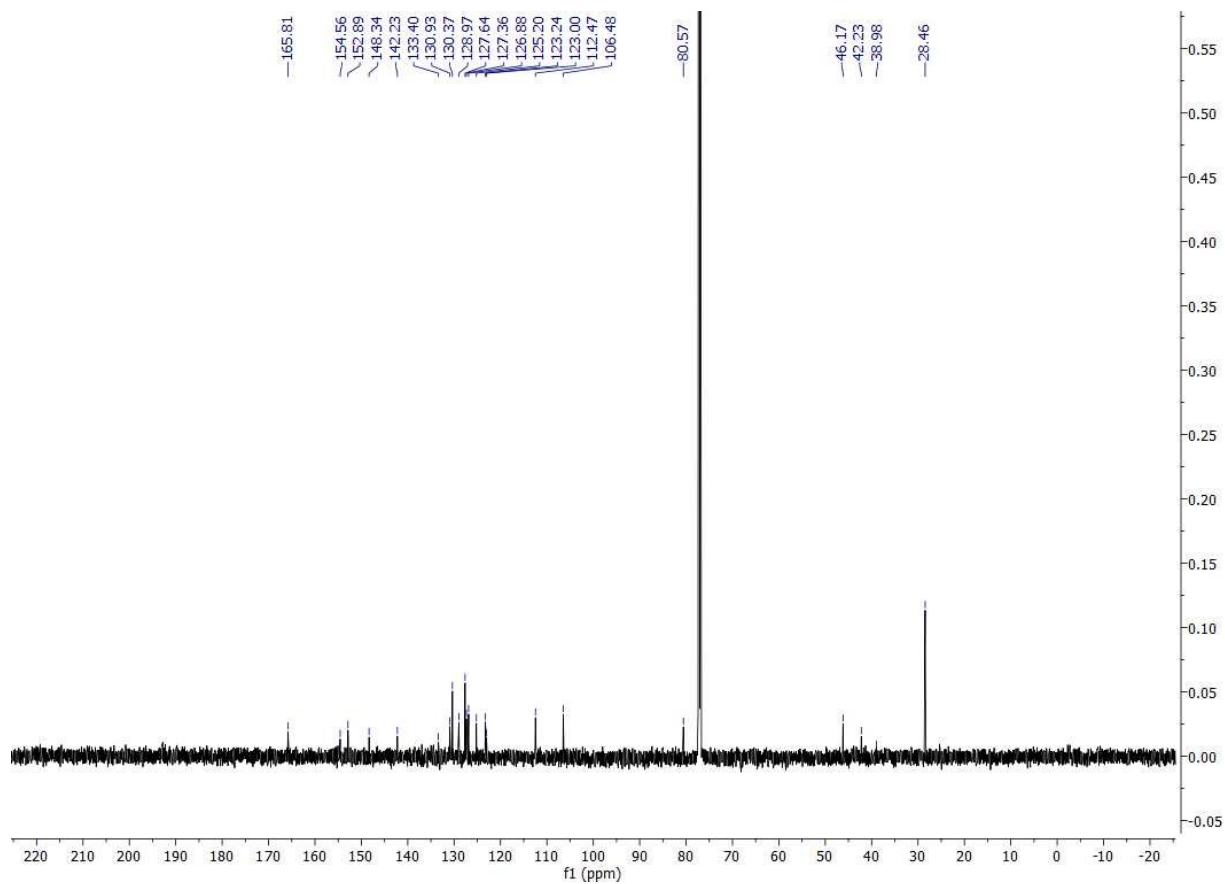

Figure S12:  $^{13}\text{C}$  NMR spectra of **13f**

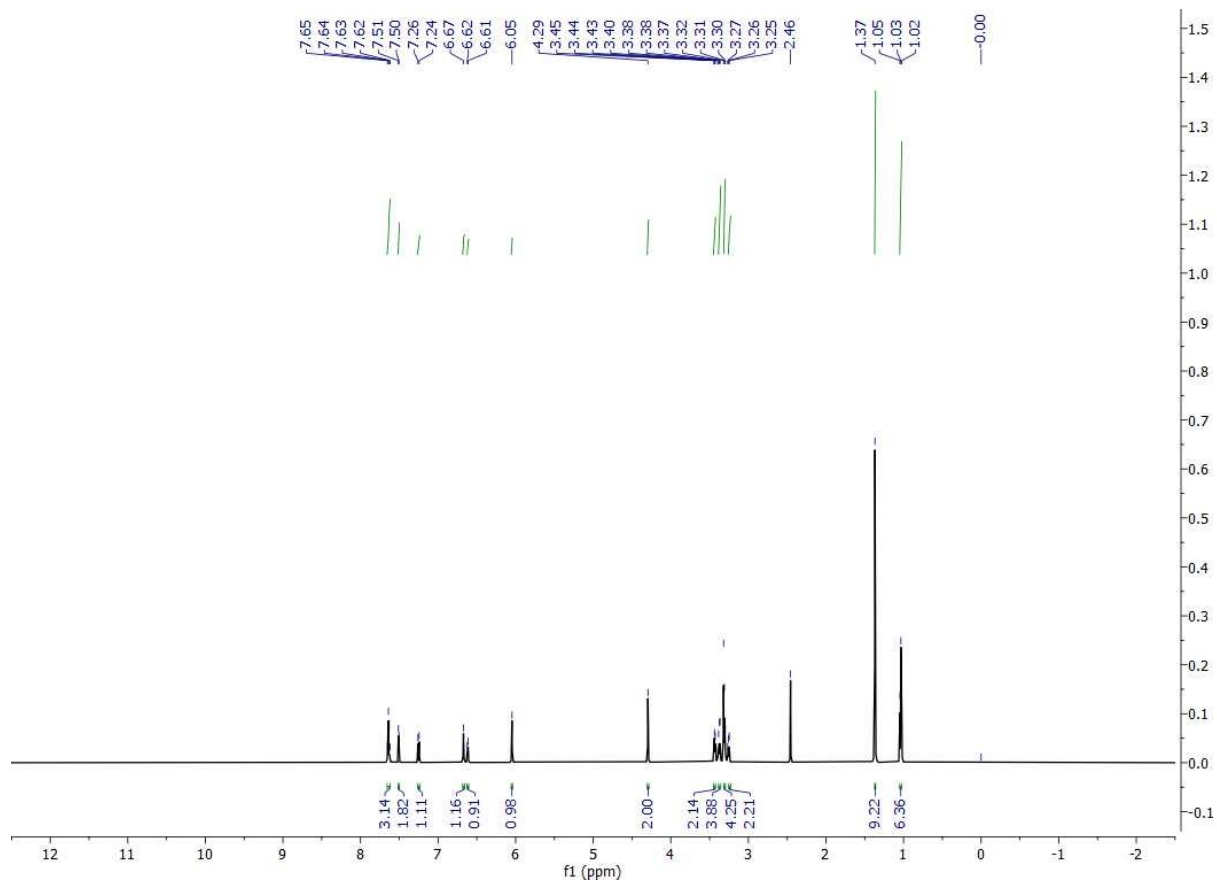

**Figure S13:**  $^1\text{H}$ NMR spectra of **13g**

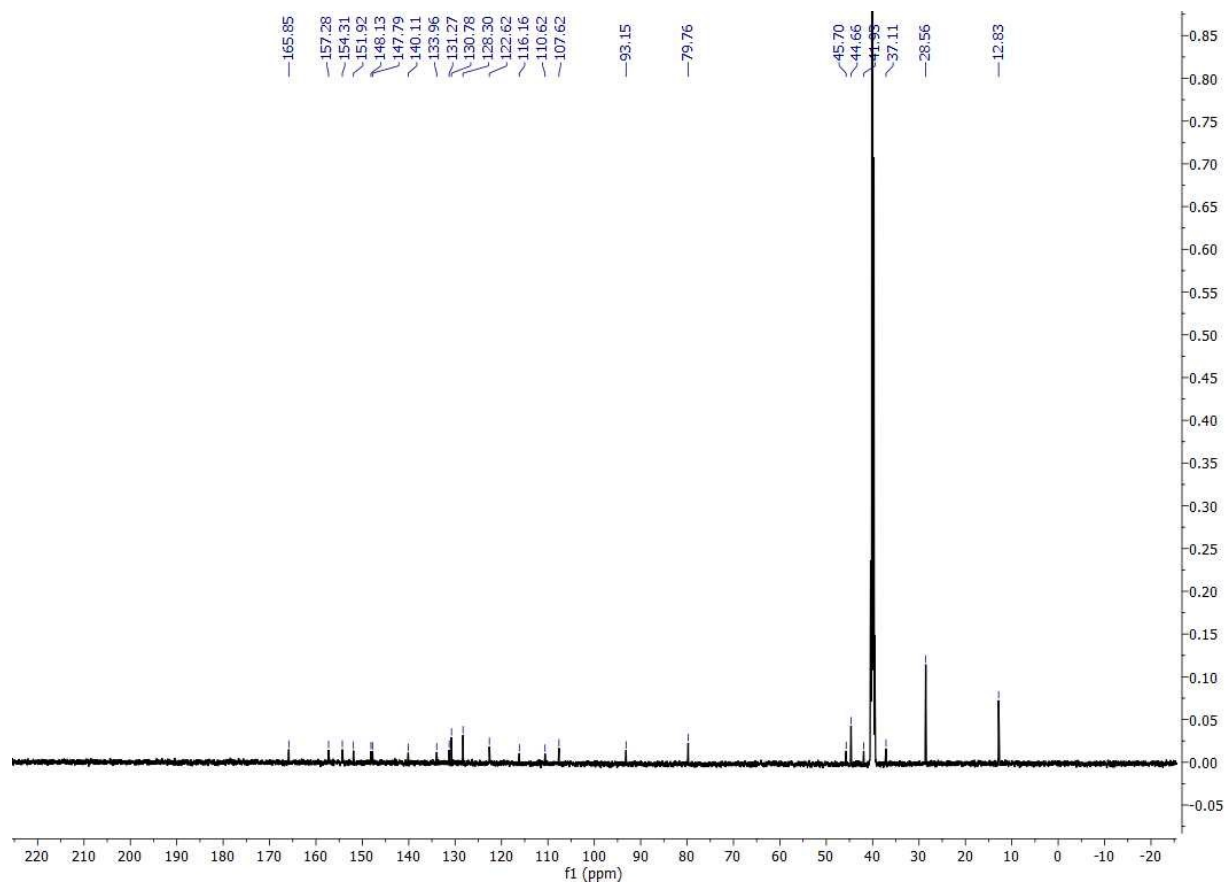

**Figure S14:**  $^{13}\text{C}$  NMR spectra of **13g**

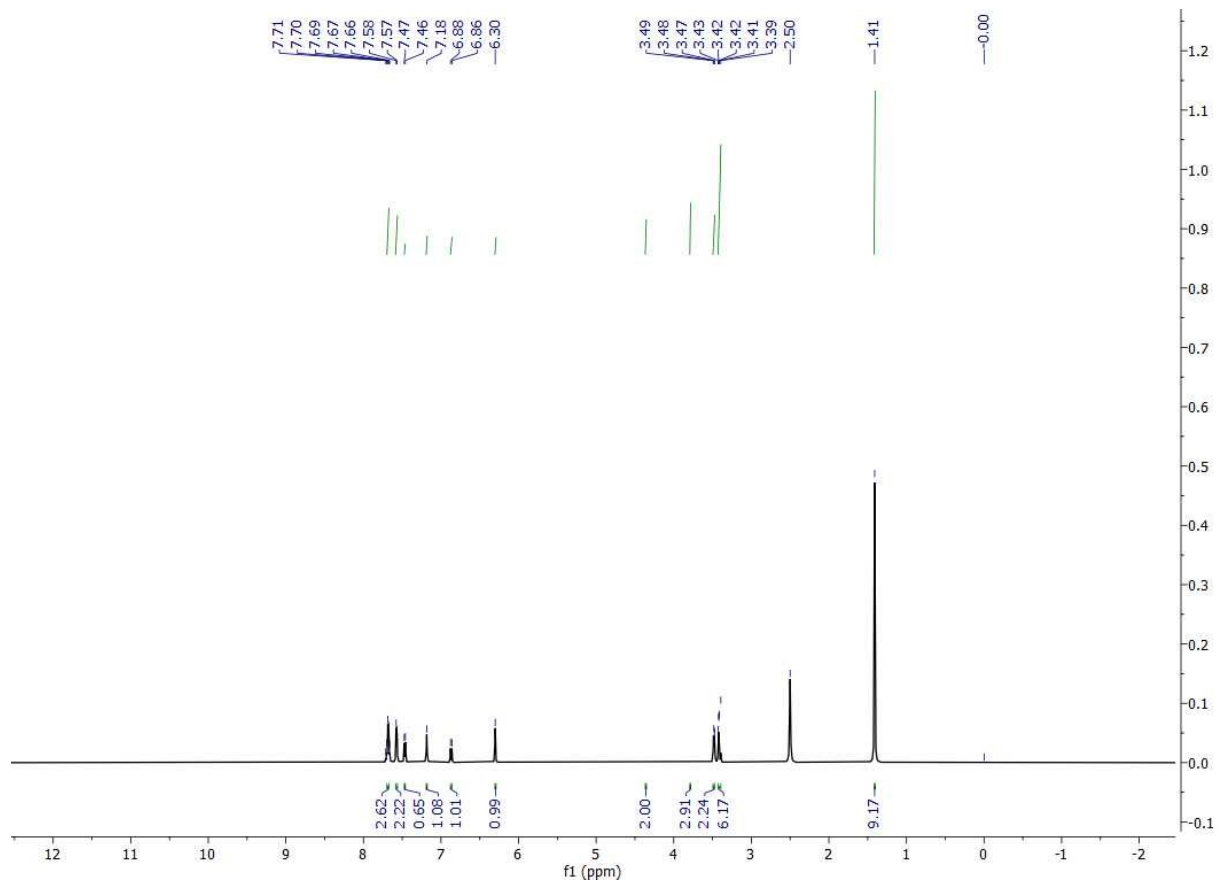

**Figure S15:**  $^1\text{H}$ NMR spectra of **13h**

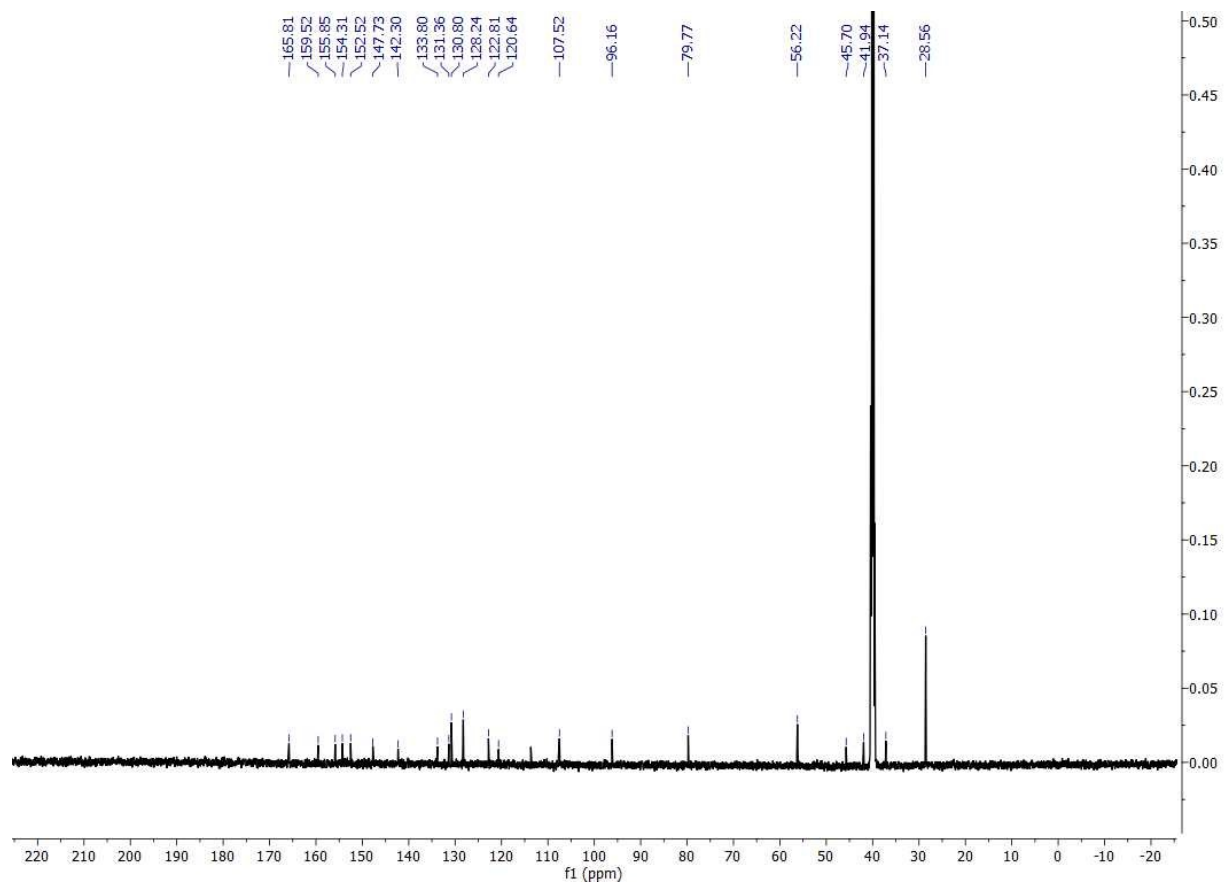

**Figure S16:**  $^{13}\text{C}$  NMR spectra of 13h

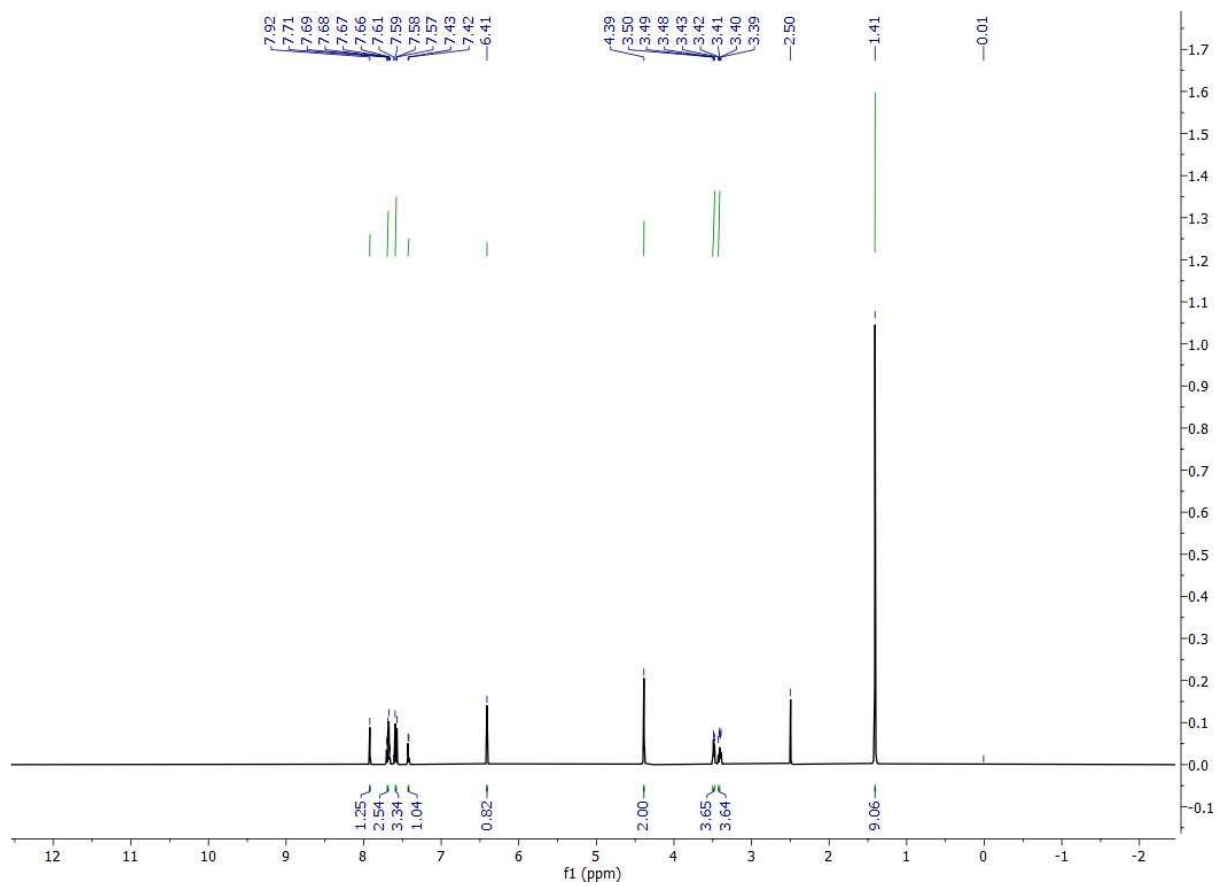

**Figure S17:**  $^1\text{H}$ NMR spectra of **13i**

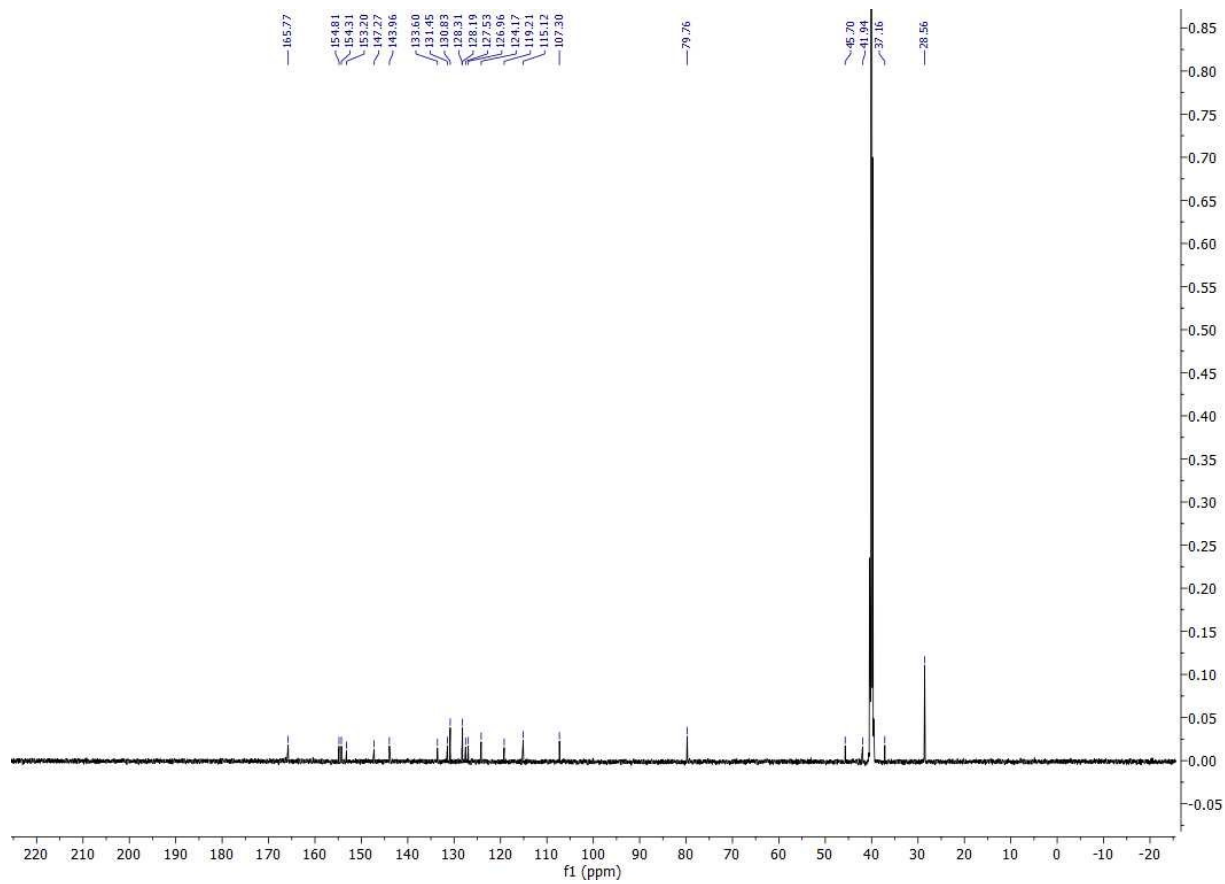

**Figure S18:**  $^{13}\text{C}$  NMR spectra of **13i**

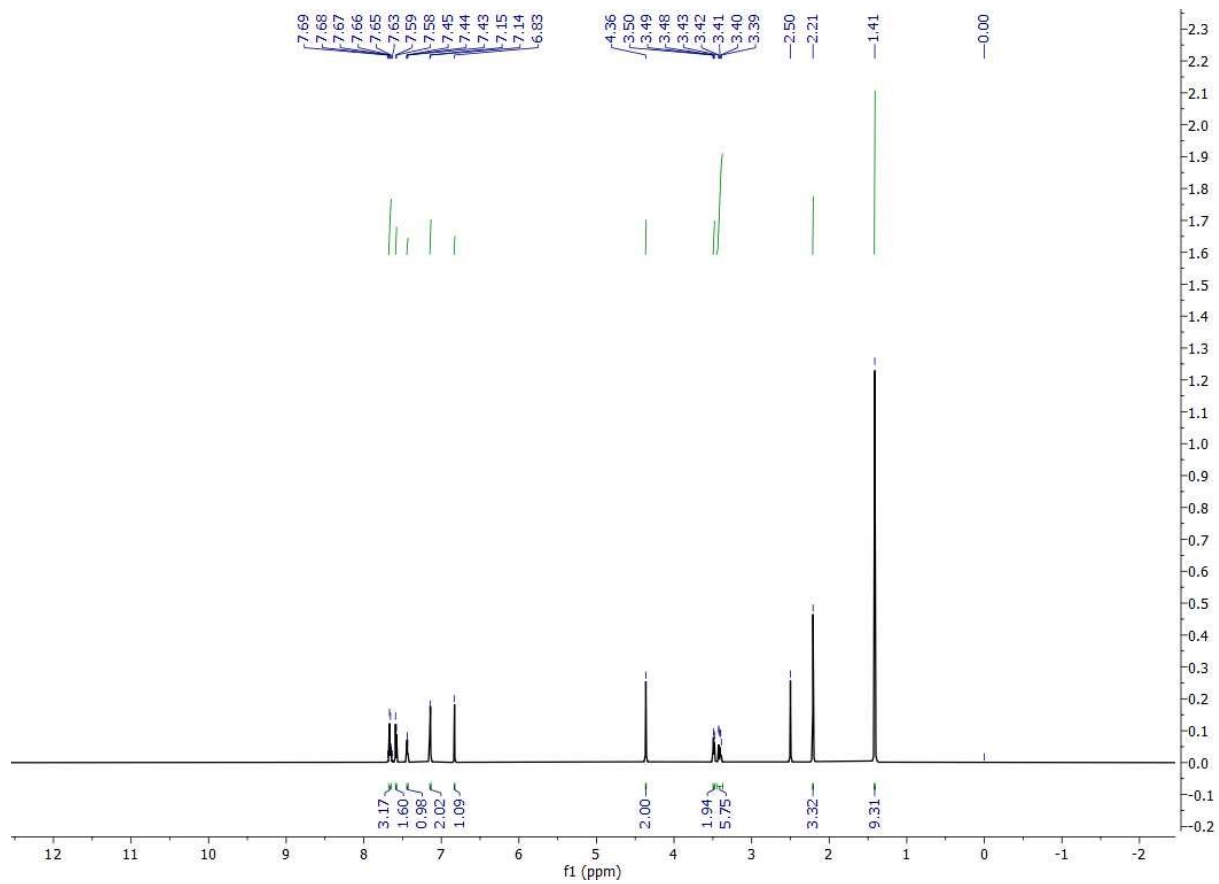

**Figure S19:**  $^1\text{H}$ NMR spectra of **13j**

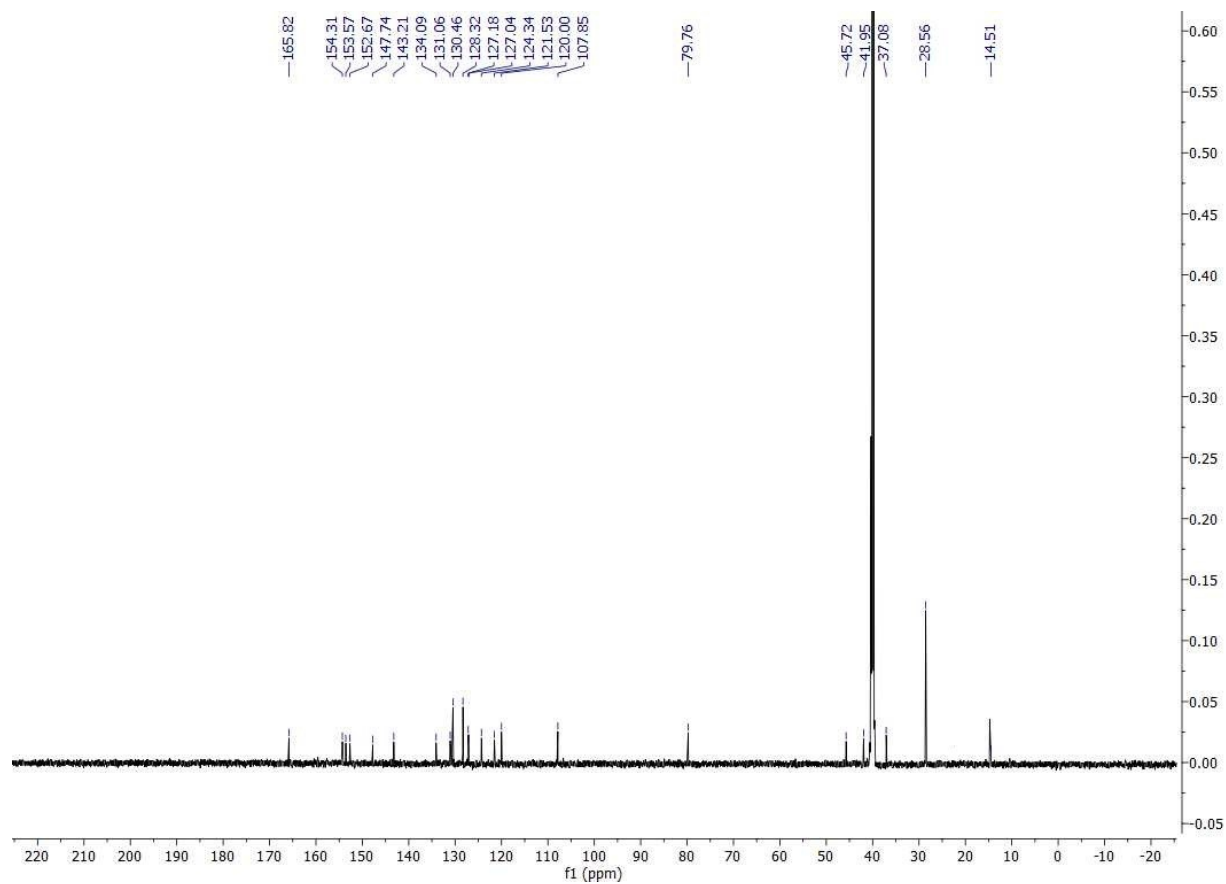

**Figure S20:**  $^{13}\text{C}$  NMR spectra of **13j**

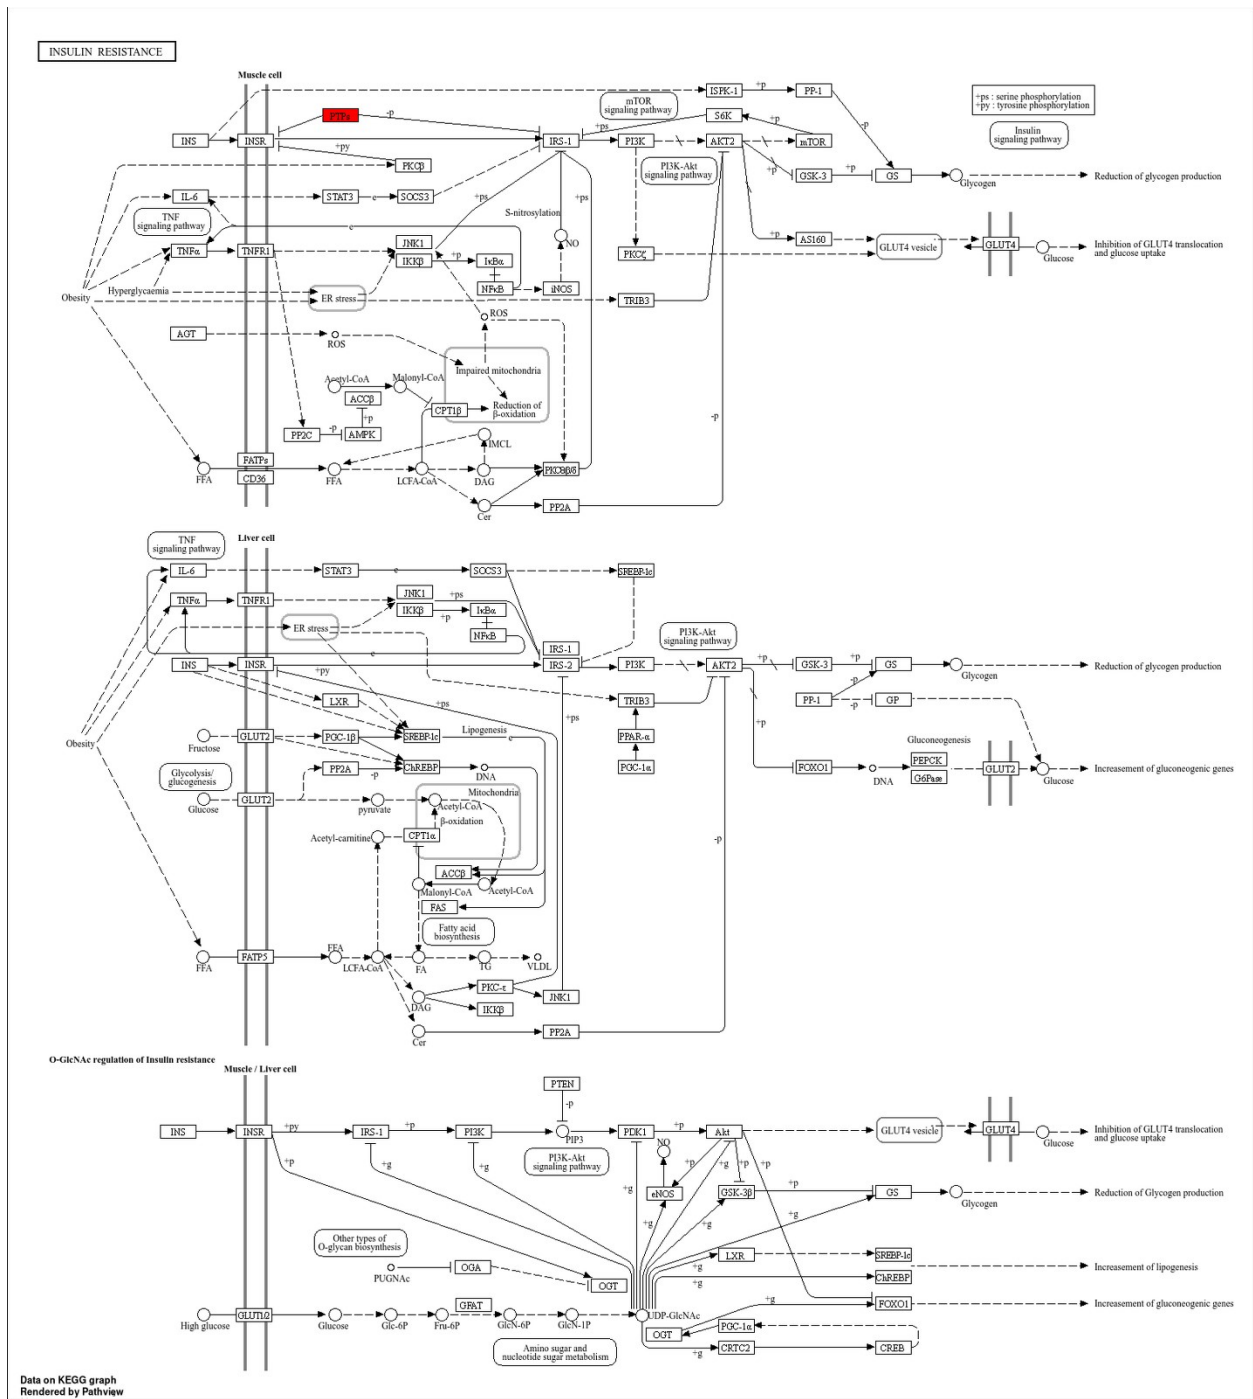

**Figure S21: Determination of Insulin resistance pathway via KEGG pathway analysis.**
